# Supplementary material for: Genome-Wide Analysis of Androgen Receptor Targets Reveals COUP-TF1 as a Novel Player in Human Prostate Cancer
Source: PLoS One. 2012 Oct 4;7(10):e46467. doi: 10.1371/journal.pone.0046467 (PMC3464259; doi:10.1371/journal.pone.0046467)
Supplement: Table S2 — Genomic locations (Hg19) and p value of enrichment upon treatment with different ligands. (XLS) [file pone.0046467.s005.xls]

## Sheet: Sheet1
Spot name	Hg19 built genomic location	vehicle	R1881	Flutamide	comments
B3GNT5	chr3:182986394-182987296	0.899428	9.1036e-06	0.653564
CDH4	chr20:59829131-59830052	0.77963	0.000191293	0.949907
mir-106_ii	chrX:133304750-133305655	0.974922	0.000869292	0.0613747
PPIAP	chr21:22199608-22200317	0.69488	0.000325908	0.0555802
SNT-1	chr12:69962140-69962866	7.27447e-05	0.00664011	4.44222e-06
MSTP033	chr14:91948439-91949179	0.816143	0.101122	3.79629e-05
CSTN3	chr12:7284307-7285229	0.91817	0.615065	0.000619668
EFNB1	chrX:68048333-68049082	0.631443	0.602125	2.96244e-05
PFKFB2	chr1:207207039-207207986	0.537172	9.84037e-05	0.174847
PRO1843	chr12:53435605-53436556	0.403843	0.000507987	0.871066
KIAA0087	chr7:26578204-26579155	0.369289	0.0266035	0.000978363
RANBP3	chr19:5916207-5917111	0.569955	0.808293	1.34885e-05
CSN2	chr4:70826650-70827389	0.0036096	1.25422e-05	0.367551
HOXD12_2,0	chr2:176961793-176962843	0.425037	0.665866	0.000920644
Intergenic105C	chr13:69340851-69341705	7.41692e-05	0.00122518	0.00318669
miR-105-1_iv	chrX:151562885-151563791	0.102461	8.46269e-07	0.451401
MATP	chr5:33984537-33985452	0.823449	0.000187183	0.2227
LOC63928	chr16:23769369-23770193	0.762576	0.000170575	0.809539
IFNA13	chr9:21440447-21441414	0.794278	0.000923804	0.125216
BC004154_3,0	chr5:92916880-92917977	0.000951489	0.0116264	0.000125467	coup-tf1 upstream
FCGR1A_0,0	chr1:149753583-149754635	0.509127	0.000207463	0.045963
AMY2A	chr1:104160296-104160999	0.376171	0.667091	0.000228502
RNF27	chr10:104403670-104404397	0.169109	0.000450912	0.526878
EMR3	chr19:14785420-14786147	0.488441	0.000130759	0.341092
Intergenic108C	chr13:87399487-87400342	1.39574e-05	9.99097e-05	5.78323e-06
let-7c_i	chr21:17911675-17912630	0.0124253	0.218473	0.00046173
GLDC	chr9:6532580-6533382	0.491013	0.000148825	0.773902
KIR3DL1	chr19:55327982-55328894	1.3218e-06	0.595648	0.358217
KIAA0894	chr10:97116761-97117542	6.07036e-05	0.000614977	0.379231
CCND1	chr11:69455295-69456101	0.000208151	0.00184067	0.0002743
GLI3_0,1	chr7:42261576-42262648	0.0350424	0.000301926	0.00973207
NR2F1	chr5:92920051-92920757	0.301447	0.156254	0.000979892	coup-tf1 5' UTR
ZFP	chr3:44597789-44598696	0.198592	0.30849	2.14364e-05
PRDM7	chr16:90128609-90129463	1.06569e-05	0.0783889	0.179389
LY95	chr6:41317685-41318592	0.356706	0.633915	0.000583619
ING4	chr12:6772129-6773056	0.694285	0.000474938	0.456074
DLL3_0,0	chr19:39988869-39989944	0.4436	0.418644	3.77452e-05
GPR85	chr7:112727806-112728508	0.198069	0.000881732	0.396916
KCNB2	chr8:73479306-73480117	0.104675	0.64431	0.000650278
MEIS1(1000-0)_0,0	chr2:66661923-66662875	0.000729868	0.778408	0.460861
POU2F1_2,0	chr1:167187487-167188515	0.0954995	6.54909e-06	0.315275
DOCK1	chr10:128593334-128594037	1.21904e-05	2.31016e-05	1.35914e-05
ELK3	chr12:96587686-96588397	0.000132723	3.04886e-06	0.316988
LHX3_0,0	chr9:139096548-139097579	0.252838	0.468617	6.96729e-05
FLJ11016	chrX:106362025-106362740	0.348105	0.250556	0.000204376
B29	chr18:48346058-48346979	0.827817	0.000476171	0.548127
BC011685_0,2	chr13:114240361-114241361	0.357159	0.489513	3.17217e-05
RNU42A_NR_000014		0.319341	0.373197	0.000291041
_chr17_0,0	chr17:27049759-27050739
Intergenic125D	chrX:143862500-143863581	0.0107806	0.0129296	8.06082e-05
mir-222_i	chrX:45606070-45606971	0.000185646	0.0382468	0.0538283
ZNF262_i	chr1:35884631-35885440	0.387614	0.230973	7.6035e-05
TLK2	chr17:60556696-60557505	0.594581	0.0665712	0.000393912
PDE1C	chr7:32110806-32111530	0.310246	0.000383483	0.000881408
Intergenic74C	chr3:104022379-104023331	0.989518	0.000707554	0.00174925
DKFZP564J157	chr19:40449487-40450394	0.367241	0.851114	7.97235e-05
Intergenic10C	chr5:165115891-165116868	0.000307732	0.000129935	2.56708e-05
TCF21_0,0	chr6:134209585-134210614	0.00194866	0.000942736	0.00665494
AKAP6	chr14:32797827-32798730	0.0539867	0.000160733	0.0171827
NPHS1	chr19:36342598-36343406	0.394385	0.0162018	0.000800211
KIAA0418	chr10:105453140-105453853	0.583583	0.714239	8.93232e-05
ANKT	chr15:41624421-41625335	0.000974642	0.285228	0.286061
SMAP1	chr6:71376811-71377757	0.996711	8.09766e-07	0.726766
Intergenic71E	chr14:41008579-41009549	0.00759944	0.000384725	0.0438515
DDX24	chr14:94547451-94548184	0.199114	0.565491	7.97508e-05
SPAG8	chr9:35812029-35813004	0.319763	0.000904074	0.19012
mir-26b_iv	chr2:219264209-219265119	0.000233585	0.420276	0.671134
FBXO4	chr5:41924703-41925529	0.518351	0.0288012	0.00021157
FLJ12542	chr18:12702473-12703456	0.399396	6.12683e-06	0.66659
HDAC2_0,0	chr6:114292052-114292915	0.000431845	0.465666	0.329302
Intergenic19A	chr4:28852966-28853816	5.83523e-05	1.87153e-05	4.92356e-05
Intergenic106D	chr4:179303093-179304044	0.000175017	8.41769e-05	9.15839e-05
CASQ2	chr1:116242826-116243633	0.518253	0.000577402	0.87939
STX6	chr1:180991911-180992754	0.410842	9.97664e-05	0.000302594
DIRC1	chr2:189654635-189655526	0.455228	6.6009e-05	0.354205
Intergenic47B	chr6:103817614-103818513	0.118716	0.000380513	0.0137992
LOC55901	chr13:52979989-52980790	0.588005	0.748188	8.55243e-05
LOC81537	chr14:64194524-64195433	0.210531	0.77612	0.000126358
IL18R1	chr2:102978353-102979274	0.2472	0.186904	1.43613e-05
HOXB7_1,0	chr17:46689054-46689961	0.153897	0.68411	0.000198821
FLJ22649	chr4:177240379-177241338	0.579507	0.405559	0.000210305
Intergenic22D	chr11:38419183-38420070	0.00045146	0.00405801	0.00457614
CIC_0,0	chr19:42788190-42789137	0.000369934	0.185387	0.00152465
IL1R2	chr2:102607679-102608596	2.72145e-05	3.51406e-05	3.66769e-05
NNMT	chr11:114167281-114168031	0.661689	0.000312429	0.262247
Intergenic112A	chr2:76821324-76822302	0.00385332	0.000940504	0.00174229
Intergenic112D	chr2:76850177-76851218	0.025235	0.104341	3.10651e-06
AIM2	chr1:159046397-159047297	0.982586	4.5035e-06	0.575469
HOXB13	chr17:46805922-46806749	0.0007495	0.0103465	8.42262e-05
FLJ21212	chr9:101584922-101585664	3.77108e-05	0.629089	0.470328
OR1A2	chr17:3100972-3101748	0.463983	0.00031091	0.51876
DMBT1	chr10:124320285-124321156	0.0161801	0.00447107	0.00033154
Intergenic80E	chr4:59023052-59023979	0.000299531	0.56208	0.0712172
Intergenic92C	chr4:12386500-12387541	0.00128293	0.00828553	0.000400524
MAP1A/1BLC3	chr16:87425259-87426060	0.463328	0.583312	8.12395e-05
IFNA6	chr9:21350660-21351622	0.000283353	0.0920022	0.172459
BC006322_3,0	chr1:212778336-212779408	0.194357	0.0330614	0.000134604
Intergenic129B	chr13:89161553-89162423	0.253093	0.00495518	6.98786e-05
Intergenic88B	chr12:87369251-87370126	1.39843e-05	2.48693e-05	0.000112409
miR-184_iii	chr15:79499911-79500879	0.390205	0.120375	1.55274e-05
BIRC3	chr11:102193911-102194711	0.371708	0.605705	4.93638e-05
PLN	chr6:118868757-118869562	0.299618	0.000936394	0.465771
USP8	chr15:50790803-50791614	0.108373	1.98716e-06	0.475776
DKFZp564I1922	chrX:3261660 3262566	0.000169548	0.00807578	3.31971e-05
LANGERIN	chr2:71062759-71063670	0.0536139	0.000283145	0.258621
PRDM2	chr1:14042078-14043013	8.31202e-05	0.0194361	0.000125372
RAB3-GAP150_i	chr1:220326564-220327369	0.00101339	0.175774	0.000990019
mir-196-1_i	chr17:46709457-46710399	0.054384	0.244505	0.000740001
RAB3-GAP150	chr1:220326564-220327369	0.000353806	0.00126265	0.00110825
KRTHA4	chr17:39538498-39539209	0.861139	0.000975536	0.393981
C21orf41	chr21:30967868-30968589	0.0196188	0.0260545	6.59613e-05
JTV1	chr7:6048924 6049743	0.94485	0.000541193	0.780954
ETV6_0,1	chr12:11803105-11804236	0.556378	0.40426	1.08991e-05
PIR	chrX:15402947-15403899	0.0673546	3.00826e-05	0.470876
RTVP1	chr12:75873884-75874778	0.000125813	0.00125322	0.000164116
MAP3K4_0,0	chr6:161412142-161413238	0.00304822	0.435347	0.000440508
BC004154_2,0	chr5:92917898-92918950	0.0436967	0.487454	0.00080602	coup-tf1 promoter
CTNNA2	chr2:79878109-79878905	1.91224e-05	4.67405e-06	9.39949e-06
LST1_0,1	chr6:31555687-31556760	9.02809e-05	0.0726223	0.0296265
POU3F1_0,0	chr1:38512131-38513204	6.76039e-05	0.833538	0.295641
Intergenic123B	chr12:84381830-84382682	2.87839e-05	0.54989	0.365728
13.96_ii	chr15:35545239-35546139	0.147824	5.14641e-05	0.248163
SIGLEC5	chr19:52115274-52116174	0.041697	0.000350489	0.0377734
NDST4	chr4:116034868-116035669	0.538209	9.75138e-05	0.362194
MC3R	chr20:54823117-54824024	0.000364059	0.116611	0.000726796
FLJ12704	chr1:210027860-210028638	0.396751	0.000834101	0.0268916
MGC15730	chr1:18434354-18435315	0.350761	1.24412e-05	0.341014
HDAC4_1,0	chr2:240323330-240324427	0.989205	0.000406991	0.942346
ATOH1_2,0	chr4:94747312-94748415	0.110992	0.000717788	0.100435
CKTSF1B1	chr15:33009773-33010509	0.403647	8.4498e-07	0.322552
TRIAD3	chr7:5770290-5771158	0.228851	0.000994622	0.429439
HAL	chr12:96389863-96390675	3.50177e-05	0.45644	0.237283
KRTHA5	chr17:39637449-39638273	0.807363	0.000848164	0.639445
NYD-SP25	chr9:6328451 6329369	0.471403	0.791791	0.000865705
Intergenic24C	chr2:146940322-146941338	5.02116e-05	0.0957158	5.99498e-05
BTNL2	chr6:32374719-32375620	0.390382	1.23713e-06	0.285838
SOX5_0,0	chr12:24102396-24103402	0.00278963	0.000963548	0.000111348
FOXI1_0,0	chr5:169532156-169533157	0.066603	0.201722	0.000924033
PP1044	chr17:5402834-5403635	0.599961	7.39446e-06	0.523005
ZNF74_0,0	chr22:20747881-20748894	0.013821	0.00107139	0.000757527
ALDH3B2	chr11:67442087-67442799	4.05644e-05	0.750153	0.459483
FLJ21742	chr19:16606588-16607418	0.472873	0.000665408	0.430332
LOC64116	chr4:103273941-103274839	0.954098	0.000958819	0.807559
Intergenic81D	chr8:137693288-137694288	0.40246	0.000216413	0.445267
TCTEL1_1,0	chr6:159066490-159067514	0.46019	1.67641e-05	0.435351
16.23_iii	chr7:93113014-93113962	0.402592	0.000518947	0.0656495
ROBO1	chr3:79173737-79174651	0.492792	1.23667e-05	0.923294
SCNN1A	chr12:6456054-6456972	0.555806	0.000920756	0.866726
SLC17A2	chr6:25930752-25931673	0.170062	0.304137	0.000316964
HOXD11_3,0	chr2:176968415-176969429	0.54265	4.0986e-05	0.862301
mir-199a-2_ii	chr1:172114161-172115068	0.000690759	0.000241102	0.00552293
DNAJL1	chr10:22209735-22210539	0.864172	1.73418e-05	0.0324868
PBX4_0,0	chr19:19729070-19730100	5.40298e-06	0.668219	0.262038
KCNS3	chr2:18098246-18099141	0.132108	0.00012113	0.204164
TLX3_0,2	chr5:170737574-170738585	0.490838	7.577e-06	0.188325
NYX	chrX:41305995-41306899	0.391162	0.000116937	0.624604
CASP1	chr11:104896912-104897728	0.511295	3.2211e-05	0.435693
GRIN2A	chr16:9855519-9856350	0.00924153	0.00042422	0.597897
INPP5D	chr2:234115732-234116480	0.841258	4.30929e-06	0.454652
CORO2A	chr9:100954672-100955635	0.454931	6.50462e-05	0.50998
Intergenic13E	chr14:84062896-84063769	0.214113	7.18179e-06	0.0292009
NM_173480_0,0	chr19:2900388-2901279	0.371207	0.000391532	0.451327
mir-220_iv	chrX:122698232-122699153	0.000398159	0.00080076	6.88685e-06
SNTG1	chr8:50823601-50824416	0.100321	0.00089953	0.00609769
MTRR	chr5:7900284 7901199	0.998129	0.147822	0.000190592
TNNC1	chr3:52487837-52488780	0.000943545	0.599202	0.330134
Intergenic73A	chr11:97334005-97334882	0.126984	6.83032e-05	0.00251606
Intergenic117E	chr3:34810728-34811700	8.72198e-05	0.000477822	4.06958e-05
ZNF157	chrX:47229390-47230090	0.376867	0.000392056	0.494674
DPCR1	chr6:30919091-30919917	0.619518	0.000501095	0.447012
COVA1	chrX:129804001-129804742	0.00265924	5.67951e-05	6.41687e-05
HOXD10	chr2:176980793-176981722	0.599333	0.000561908	0.485345
MGC5384	chr19:53207797-53208667	0.0227855	0.000291666	0.215568
LAMP2	chrX:119603067-119603863	0.00996135	0.000913574	0.000588544
Intergenic73D	chr11:97366323-97367203	0.129674	0.446086	0.000576423
Intergenic117B	chr3:34779341-34780339	0.00248277	0.000919491	0.0030622
LOC51125	chr8:41347326-41348226	0.487551	2.77221e-05	0.463358
RYR3	chr15:33602455-33603289	0.109139	0.000337614	0.0424635
PAP	chr2:79384160-79384933	0.758432	0.0009289	0.367556
PDE4B	chr1:66838501-66839278	0.146711	0.000120426	0.528568
NUP133	chr1:229577116-229578012	0.505985	0.000102306	0.545094
MLLT4_0,0	chr6:168227042-168227901	0.000186986	0.231854	0.397628
FLJ14825	chr8:124286307-124287007	0.770877	7.86729e-05	0.6881
TCN2	chr22:31002530-31003432	0.306866	4.47081e-05	0.411772
AKR1B1	chr7:134143700-134144605	0.848477	0.000593755	0.228303
NR6A1	chr9:127282524-127283349	0.403345	0.814024	3.59788e-05
PURG	chr8:30890093-30891028	0.522591	0.000129131	0.597924
ARHGDIB	chr12:15114600-15115378	0.042789	0.163013	0.000675011
RNU1G2_M20033		0.433394	0.000117463	0.114297
_chr1_0,0	chr1:17063629-17064565
FLJ23142	chr2:175268148-175269018	0.160237	0.000596205	0.196576
ADAM33	chr20:3662646-3663434	0.435123	0.000484037	0.462141
RPL21	chr10:122114169-122115123	0.105389	0.000649334	0.243242
Intergenic78A	chr4:136149161-136150104	5.73556e-05	0.227758	0.200851
PCBP2	chr12:53847824-53848729	0.000281182	0.717102	0.511192
FLJ11017	chr4:37585283-37586016	0.000216679	0.224001	0.478086
F9	chrX:138612223-138612970	0.341584	0.0001645	0.439393
KIFC3	chr16:57831969-57832725	0.000538994	0.469863	0.712651
RFP	chr6:28891659-28892418	0.750875	0.836415	0.000556015
GRIA3	chrX:122317557-122318505	0.00041557	3.1357e-05	8.70296e-05
SIG11	chr20:54554778-54555671	0.0776401	0.000269932	0.984206
Intergenic57A	chr2:195310814-195311746	0.00300364	1.14092e-05	0.00464089
Intergenic40A	chr16:63504163-63505026	0.207231	0.0510377	0.000547201
RFX4	chr12:106994262-106995162	0.827422	0.000968687	0.927072
ACF	chr10:52645260-52645994	9.38547e-05	0.428845	0.993592
KIAA0848	chr3:164914442-164915184	4.50549e-05	5.17879e-06	4.54144e-05	same as SLITRK3
CGI-152	chr19:19772765-19773605	0.000679737	0.168163	0.011674
MLL3	chr7:151878520-151879333	0.472797	0.000692683	0.442497
MYCBP	chr1:39328636-39329585	0.571013	0.000866527	0.922638
Intergenic75E	chr4:61025687-61026571	0.249263	0.000607293	0.148359
ABCB1_1,0	chr7:87343296-87344198	0.300504	0.00062246	0.150638
Intergenic66B	chr14:48921841-48922750	0.330074	9.59423e-05	0.209774
Intergenic98D	chr3:80153498-80154499	0.377409	0.000491509	0.791374
Shown in table probes on array that were enriched in at least one of the conditions used.
For each probe shown genomic location (hg19) and p-value of enrichment in all three conditions.
